# Supplementary material for: Elevated Serum Chloride Levels Contribute to a Poor Prognosis in Patients with IgA Nephropathy
Source: Hindawi journal article supplement (doi:10.1155/2021/3598135), 2021-10-08
Supplement: f1 [file 3598135.f1.pdf]

# 1 Supplemental Material

2

Supplemental Table 1 univariate Cox regression for screening out variates into predictive prognosis models

| characters           | univariate Cox regression |         |
|----------------------|---------------------------|---------|
|                      | OR(95%CI)                 | P value |
| Age (years)          | 1.01 (0.99-1.04)          | 0.36    |
| Sex                  | 0.64 (0.35-1.16)          | 0.14    |
| Hypertension         | 2.97 (1.62-5.45)          | <0.001  |
| 24h-UTP (g/d)        | 1.12 (1.04-1.21)          | 0.002   |
| Urine RBC(/HP)       | 1.00 (1.00-1.001)         | 0.77    |
| BUN (mmol/l)         | 1.18 (1.13-1.23)          | <0.001  |
| sCr (umol/l)         | 1.01 (1.01-1.01)          | <0.001  |
| UA (umol/l)          | 1.004 (1.002-1.006)       | <0.001  |
| ALB (g/l)            | 0.99 (0.96-1.03)          | 0.71    |
| TCHO (mmol/l)        | 0.89 (0.76-1.03)          | 0.12    |
| TG (mmol/l)          | 1.00 (0.87-1.16)          | 0.99    |
| sC3 (g/l)            | 0.97 (0.76-1.23)          | 0.78    |
| sC4 (g/l)            | 0.95 (0.55-1.63)          | 0.84    |
| HGB (g/l)            | 0.96 (0.95-0.98)          | <0.001  |
| K (mmol/l)           | 1.48 (0.86-2.54)          | 0.15    |
| Na (mmol/l)          | 1.02 (0.93-1.11)          | 0.69    |
| Serum chlorine group | 3.22 (1.76-5.86)          | <0.001  |
| Ca (mmol/l)          | 0.65 (0.13-3.10)          | 0.58    |
| Mg (mmol/l)          | 1.23 (0.07-23.33)         | 0.89    |
| P (mmol/l)           | 4.88 (1.48-16.09)         | 0.009   |
| M                    | 2.17 (1.21-3.90)          | 0.009   |
| E                    | 1.16 (0.62-2.14)          | 1.16    |
| S                    | 3.64 (1.54-8.59)          | 0.003   |
| T                    |                           | <0.001  |
| T1                   | 3.34 (1.29-8.62)          | 0.01    |
| T2                   | 9.55 (4.75-19.19)         | <0.001  |
| C                    |                           | 0.84    |
| C1                   | 1.19 (0.65-2.17)          | 0.57    |
| C2                   | 1.23 (0.29-5.17)          | 0.78    |
| IgG                  |                           | 0.95    |
| IgG (1)              | 1.11 (0.47-2.61)          | 0.82    |
| IgG (2)              | 1.20 (0.30-4.98)          | 0.81    |
| IgM                  |                           | 0.57    |
| IgM (1)              | 1.02 (0.52-2.00)          | 0.95    |
| IgM (2)              | 1.69 (0.74-3.85)          | 0.21    |
| IgM (3)              | 0.000 (0.000-?)           | 0.98    |
| IgA                  |                           | 0.84    |
| IgA (1)              | 1244.19 (0.00-5.09E+082)  | 0.94    |
| IgA (2)              | 3007.65 (0.00-1.22E+083)  | 0.93    |
| IgA (3)              | 3821.36 (0.00-1.55E+083)  | 0.93    |

|                  |                       |       |
|------------------|-----------------------|-------|
| IgA (4)          | 0.99 (0.00-1.85E+278) | 1.00  |
| C3               |                       | 0.21  |
| C3(1)            | 0.75(0.29-1.90)       | 0.54  |
| C3(2)            | 1.22(0.60-2.48)       | 0.58  |
| C3(3)            | 2.35(0.88-6.33)       | 0.09  |
| A                |                       | 0.003 |
| A(1)             | 1.98(0.67-5.89)       | 0.22  |
| A(2)             | 4.15(1.74-9.91)       | 0.001 |
| Tubular necrosis | 0.91(0.22-3.77)       | 0.90  |

3

4

BUN, blood urine nitrogen; sCr, serum creatinine; UA, urine acid; ALB, albumin; 24h-UTP, 24hour-urine protein; Urine RBC, urine red blood cell;T-CHO, total cholesterol; TG,

5

triglyceride; serum C3, serum complement 3; serum C4, serum complement 4; Hb, hemoglobin; K, potassium; Na, sodium; Ca, calcium; Mg, magnesium; P, phosphorus; For Oxford

6

classification, mesangial cell proliferation score(M): M0 for score  $\leq$  0.5, M1 for score  $>$  0.5; endothelial cell hyperplasia (E): E0 for absent and E1 for present; segmental sclerosis or

7

adhesion (S): S0 for absent and S1 for present; renal tubule atrophy or renal interstitial fibrosis (T): T0 for 25% renal tubule atrophy or renal interstitial fibrosis, T1 for 26%-50% and T2  $\geq$

8

50%; crescentic lesions (C), C0 is no crescent, C1 is  $<$  25% globular crescent, C2 is  $\geq$  25% globular crescent. For immunofluorescence, immunoglobulin G(IgG): 0 for -/+, 1 for +, 2 for ++;

9

IgM, immunoglobulin M(IgM): 0 for -/+, 1 for +, 2 for ++, 3 for +++; immunoglobulin A(IgA): 0 for -/+, 1 for +, 2 for ++, 3 for +++; complement 3(C3) : 0 for -/+, 1 for +, 2

10

for ++, 3 for+++; the degree of vascular injury(A): 0 for no obvious abnormality, 1for simple vascular wall thickening, 2 for not only vascular wall thickening, but also other lesions, such

11

as fibrinoid necrosis, vitreous degeneration and so on.; renal tubular necrosis: 0 for no necrosis, 1 for necrosis.
